# Supplementary material for: Phenotyping of cancer-associated somatic mutations in the BCL2 transmembrane domain
Source: PubMed Central journal article supplement (PMC11052995; doi:10.1038/s41389-024-00516-3), 2024-04-26
Supplement: 41389_2024_516_MOESM1_ESM.pdf [file 41389_2024_516_MOESM1_ESM.pdf]

# Supplementary Information

## **Phenotyping of cancer-associated somatic mutations in the BCL2 transmembrane domain**

Diego Leiva<sup>1</sup>, Estefanía Lucendo<sup>1</sup>, Alicia Belén García-Jareño<sup>1</sup>, Mónica Sancho<sup>1,#</sup>, and  
Mar Orzáez<sup>1,#</sup>

<sup>1</sup>Targeted Therapies on Cancer and Inflammation Laboratory, Centro de Investigación Príncipe Felipe, Valencia, Spain

<sup>#</sup>Corresponding authors: [msancho@cipf.es](mailto:msancho@cipf.es) ; [morzaez@cipf.es](mailto:morzaez@cipf.es)

**Supplementary Table I.** Data of the patient samples where BCL-2 TMD mutations were found.

| MUTANT                        | F212L                | S213A                              | S213F              | A224D          | A224S                                | A224V              | I230V                                | A234D                   |
|-------------------------------|----------------------|------------------------------------|--------------------|----------------|--------------------------------------|--------------------|--------------------------------------|-------------------------|
| Attribute                     | Value                | Value                              | Value              |                | Value                                | Value              | Value                                | Value                   |
| Number of Samples Per Patient | 1                    | 1                                  | 1                  |                |                                      |                    | 1                                    | 1                       |
| Overall Survival (Months)     | 16.1                 | 3.1                                | 10.1               |                |                                      |                    | 21.7                                 |                         |
| Overall Survival Status       | 0:LIVING             | 1:DECEASED                         | 0:LIVING           |                |                                      | 0:LIVING           | 0:LIVING                             | 1:DECEASED              |
| Patient's Vital Status        | ALIVE                | DECEASED                           | ALIVE              |                | 10 years free survival               |                    | ALIVE                                | DECEASED                |
| Sex                           | Male                 | Male                               | Male               | Male           | Male                                 | Female             | Female                               | Female                  |
| Smoking History               | Prev/Curr Smoker     | Prev/Curr Smoker                   | Prev/Curr Smoker   |                | Heavy Smoker                         |                    | Prev/Curr Smoker                     | Never                   |
| Attribute                     | P-0004865-T01-IM5    | P-0006499-T01-IM5                  | P-0009189-T01-IM5  |                | LUAD-S01405                          | SP82900            | P-0002957-T01-IM3                    | P-0002136-T01-IM3       |
| Mutation Count                | 146                  | 12                                 | 67                 |                | 301                                  | 1246               | 20                                   | 7                       |
| Fraction Genome Altered       | 0.0000               | 0.1660                             | 0.0215             |                |                                      |                    | 0.6923                               | 0.5933                  |
| Cancer Type                   | Colorectal Cancer    | Mature B-Cell Neoplasms            | Melanoma           | Liver neoplasm | Non-Small Cell Lung Cancer stage IIA | Melanoma           | Non-Small Cell Lung Cancer           | Ovarian Cancer          |
| Cancer Type Detailed          | Colon Adenocarcinoma | Diffuse Large B-Cell Lymphoma, NOS | Cutaneous Melanoma |                | Lung Adenocarcinoma                  | Melanoma malignant | Lung Adenocarcinoma                  | Mixed Ovarian Carcinoma |
| DNA Input                     | 250                  | 250                                | 160.9              |                |                                      |                    | 250                                  | 250                     |
| Matched Status                | Matched              | Unmatched                          | Matched            |                | Matched                              |                    | Matched                              | Matched                 |
| Oncotree Code                 | COAD                 | DLBCLNOS                           | SKCM               |                | LUAD                                 | MEL                | LUAD                                 | MXOV                    |
| Primary Tumor Site            | Ascending Colon      | Lymph node                         | Skin               |                |                                      | SKIN               | Lung                                 | Ovary                   |
| Sample Class                  | Tumor                | Tumor                              | Tumor              |                |                                      | Tumor/Metastasis   | Tumor                                | Tumor                   |
| Sample Collection Source      | In-House             | In-House                           | In-House           | COSS2634306    | CLCGP / MPI                          | SA432539           | Outside (metastasis site lymph node) | Outside                 |
| Sample coverage               | 838                  | 1037                               | 254                |                |                                      |                    | 349                                  | 402                     |
| Sample Type                   | Primary              | Primary                            | Primary            | tumor          |                                      |                    | Metastasis                           | Primary                 |
| Somatic Status                | Matched              | Unmatched                          | Matched            |                | Matched                              |                    | Matched                              | Matched                 |
| Specimen Preservation Type    | DNA                  | FFPE                               | FFPE               |                |                                      |                    | FFPE                                 | FFPE                    |
| Specimen Type                 | Resection            | Biopsy                             | Biopsy             |                |                                      |                    | Biopsy                               | Resection               |
| Tumor Purity                  | 50                   | 60                                 | 80                 |                |                                      |                    | 30                                   | 60                      |

A

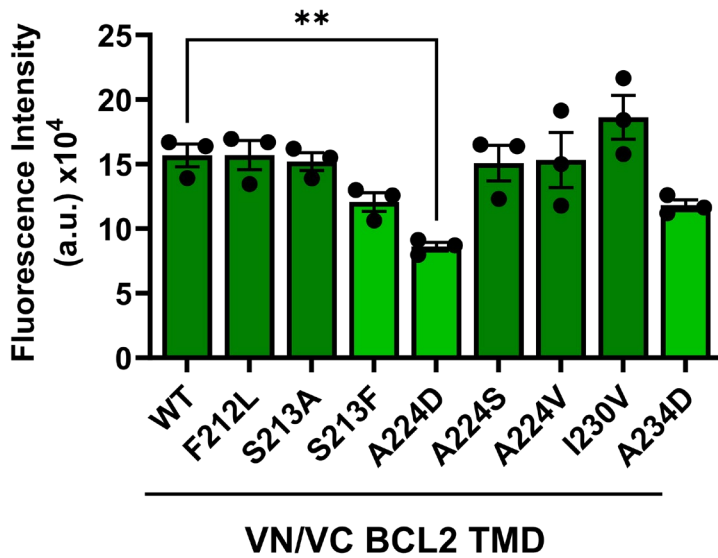

B

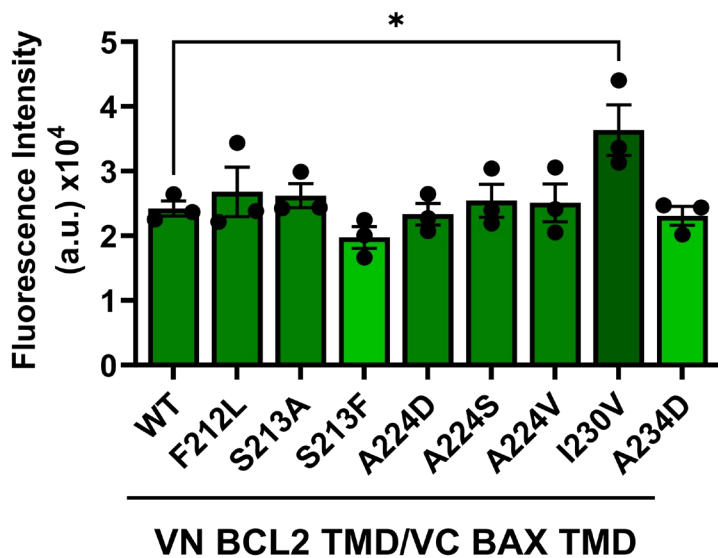

**Supp Figure 1. Mutations affecting the BCL2 TMD interfere with oligomerization in HeLa cells.** **A** Single amino acid mutations impacting the BCL2 TMD disrupt homo-oligomerization. BiFC signal measured in HeLa cells expressing wild-type (WT) or mutant BCL2 TMDs. **B** Single amino acid mutations disrupt BCL2/BAX TMD oligomerization. Interactions between BCL2 TMD mutants and BAX TMD were analyzed using the BiFC system. Data represented as mean  $\pm$  SEM of at least  $n = 3$ . Significant differences compared to the WT BCL2 TMD analyzed using Dunnett's multiple comparison test (\* $p < 0.05$ , \*\* $p < 0.01$ ).

A

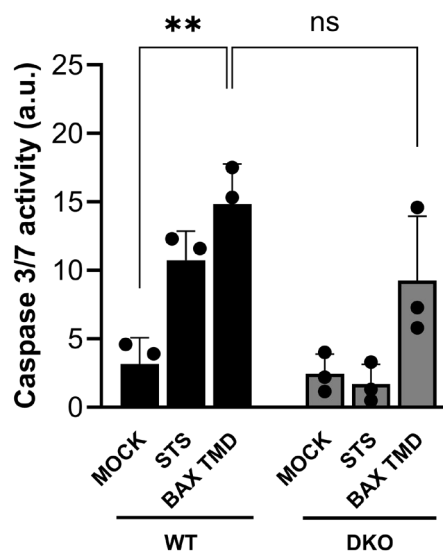

B

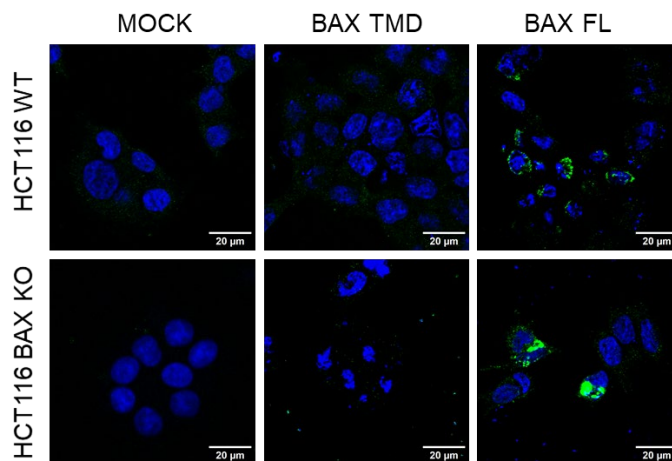

**Supp Figure 2. BAX TMD induces apoptosis in WT and BAX/BAK DKO HCT116 cells.** **A** Cell death measured by caspase 3/7 activity in HCT116 cells transfected with BAX TMD constructs in WT and BAX<sup>-/-</sup>BAK<sup>-/-</sup> cells (DKO). Cells treated with staurosporine (STS) 1  $\mu$ M were included as positive control of apoptosis induction. MOCK refers to empty vector. Data represented as mean  $\pm$  SEM of  $n = 3$ . Significant differences compared to the MOCK or BAX TMD analyzed using Šídák's multiple comparison tests (\*\* $p < 0.01$ ). **B** The transgenic BAX TMD do not displace the endogenous BAX protein to induce activation. Immunofluorescence of active BAX (clone 6A7; green signal) in HCT116 WT and BAX KO, overexpressing either BAX TMD or BAX FL, (MOCK = empty vector). Blue signal corresponds to nuclei, scale bar is 25  $\mu$ m.

A

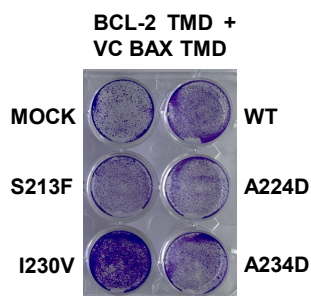

B

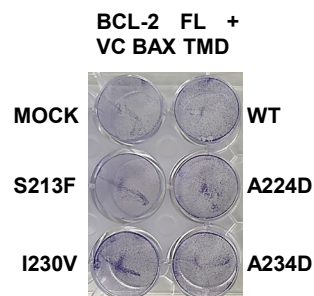

**Supp Figure 3. Representative images of crystal violet staining in cell viability studies showing that some single amino acid mutations in the BCL2 TMD impair BCL2 apoptotic function.** **A** HCT116 cells were transfected with BCL2 TMD mutants and BAX TMD. After 48 h, cells were fixed and stained with crystal violet. **B** HCT116 cells transfected with BCL2 FL mutants and BAX TMD and stained with crystal violet following the same procedure as A.

A

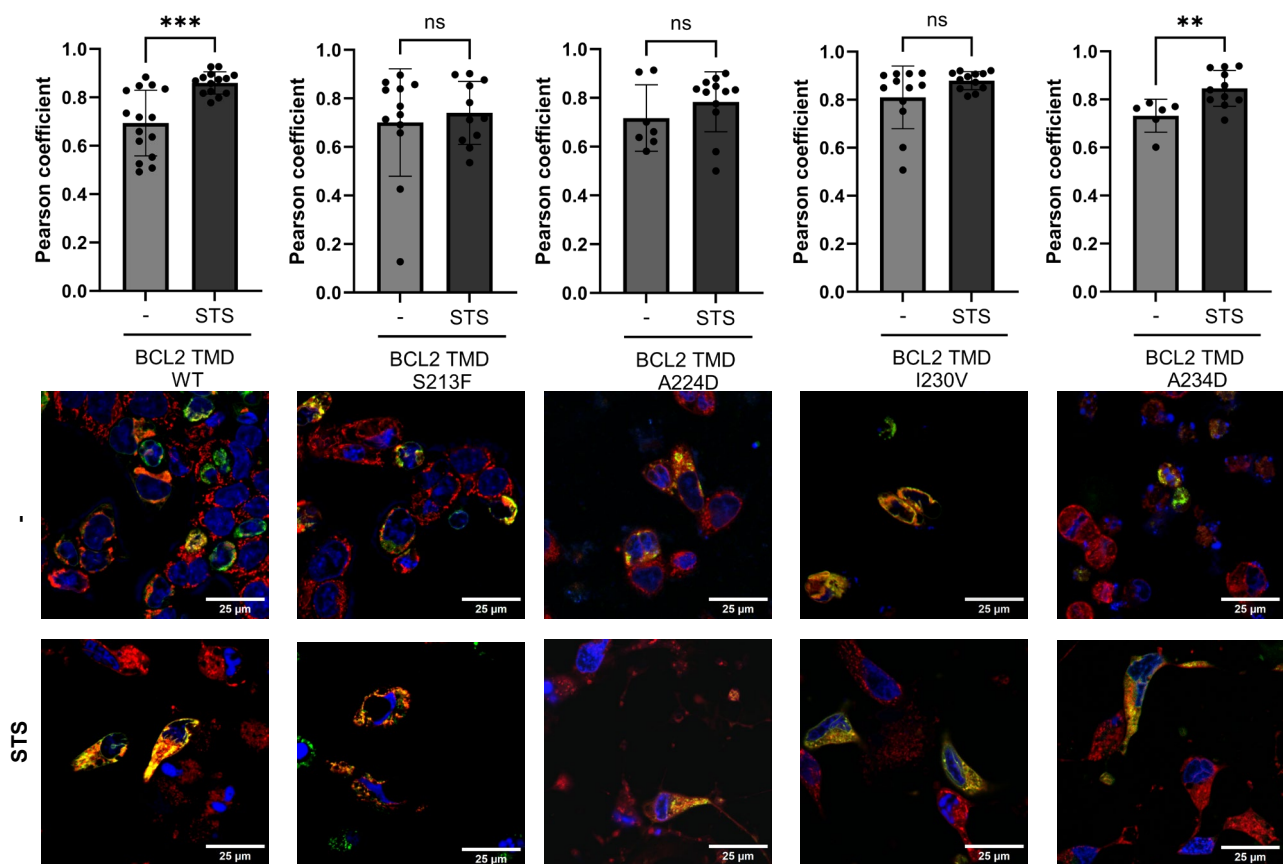

B

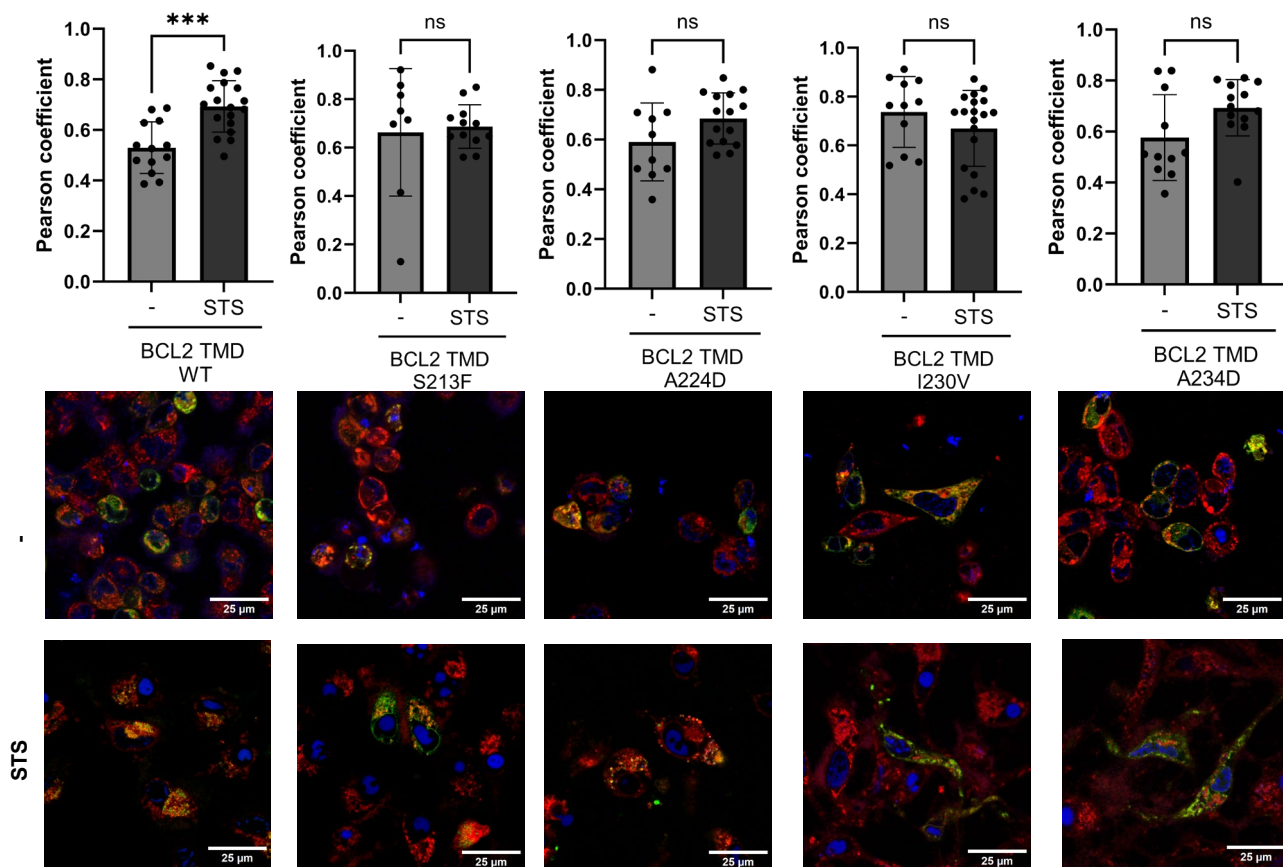

**Supp Figure 4. Characterization of subcellular distribution of BCL2 TMDs in healthy and apoptotic cells.** Representation of Pearson correlation coefficients between the BiFC BCL2 TMD constructs (green) and mitotracker (red) (A) or ER-tracker (red) (B) in healthy (-) and staurosporine (STS; 1 μM) HCT116 treated cells. Representative confocal images are depicted below the graphs. Cell nuclei are stained with Hoescht (blue). Data represented as mean ± SEM of at least n = 3. Significant differences compared to WT BCL2 TMD analyzed using Dunnett's multiple comparison test (\*\*p < 0.01, \*\*\*p < 0.001). Scale bar is 25 μm.

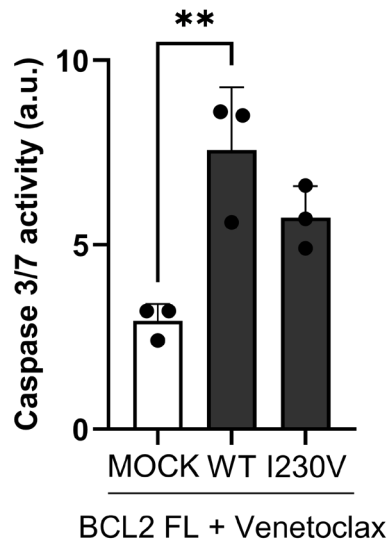

**Supp Figure 5. Cell death induced by Venetoclax in cells overexpressing BCL2 FL I230V is lower than in WT.** Caspase-3/7 activity measured in HCT116 cells transfected with BCL2 FL WT or I230V and treated with 25  $\mu$ M Venetoclax for 24 h. Data represented as mean  $\pm$  SEM (n = 3, \*\*p<0.01). MOCK refers to cells transfected with pCDNA3.1 empty plasmid.
